# Supplementary material for: Cardiosphere-Derived Cells Improve Function in the Infarcted Rat Heart for at Least 16 Weeks – an MRI Study
Source: PLOS journal article supplement (doi:10.1371/journal.pone.0025669), 2011-10-17
Supplement: S3 (10.1371/journal.pone.0025669.s003) [file journal.pone.0025669.s003]

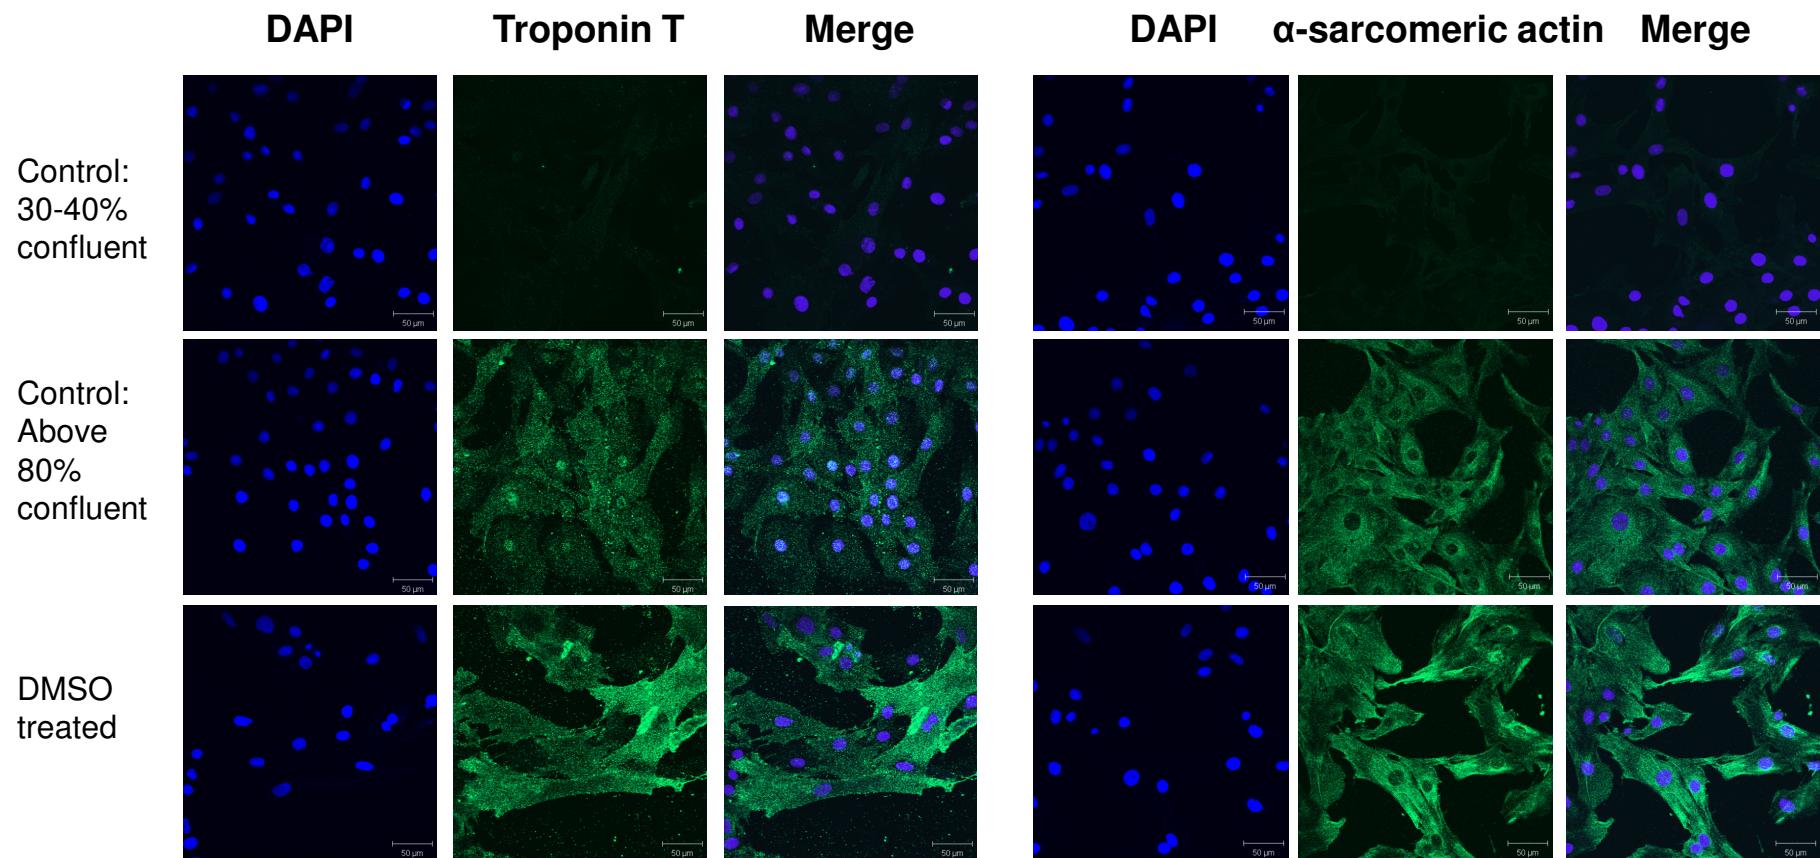

Supplementary figure S2: CDCs cultured to confluency (middle panels) showed spontaneous differentiation with expression of cTroponin T and  $\alpha$ -sarcomeric actin, which were not seen in non-confluent CDCs (top panels). Culture in differentiation medium containing DMSO (bottom panels) resulted in cells adopting an elongated morphology more indicative of a cardiomyocyte and beginning to show striations.
