# Supplementary material for: Cardiosphere-Derived Cells Improve Function in the Infarcted Rat Heart for at Least 16 Weeks – an MRI Study
Source: PLOS journal article supplement (doi:10.1371/journal.pone.0025669), 2011-10-17
Supplement: S4 (10.1371/journal.pone.0025669.s004) [file journal.pone.0025669.s004]

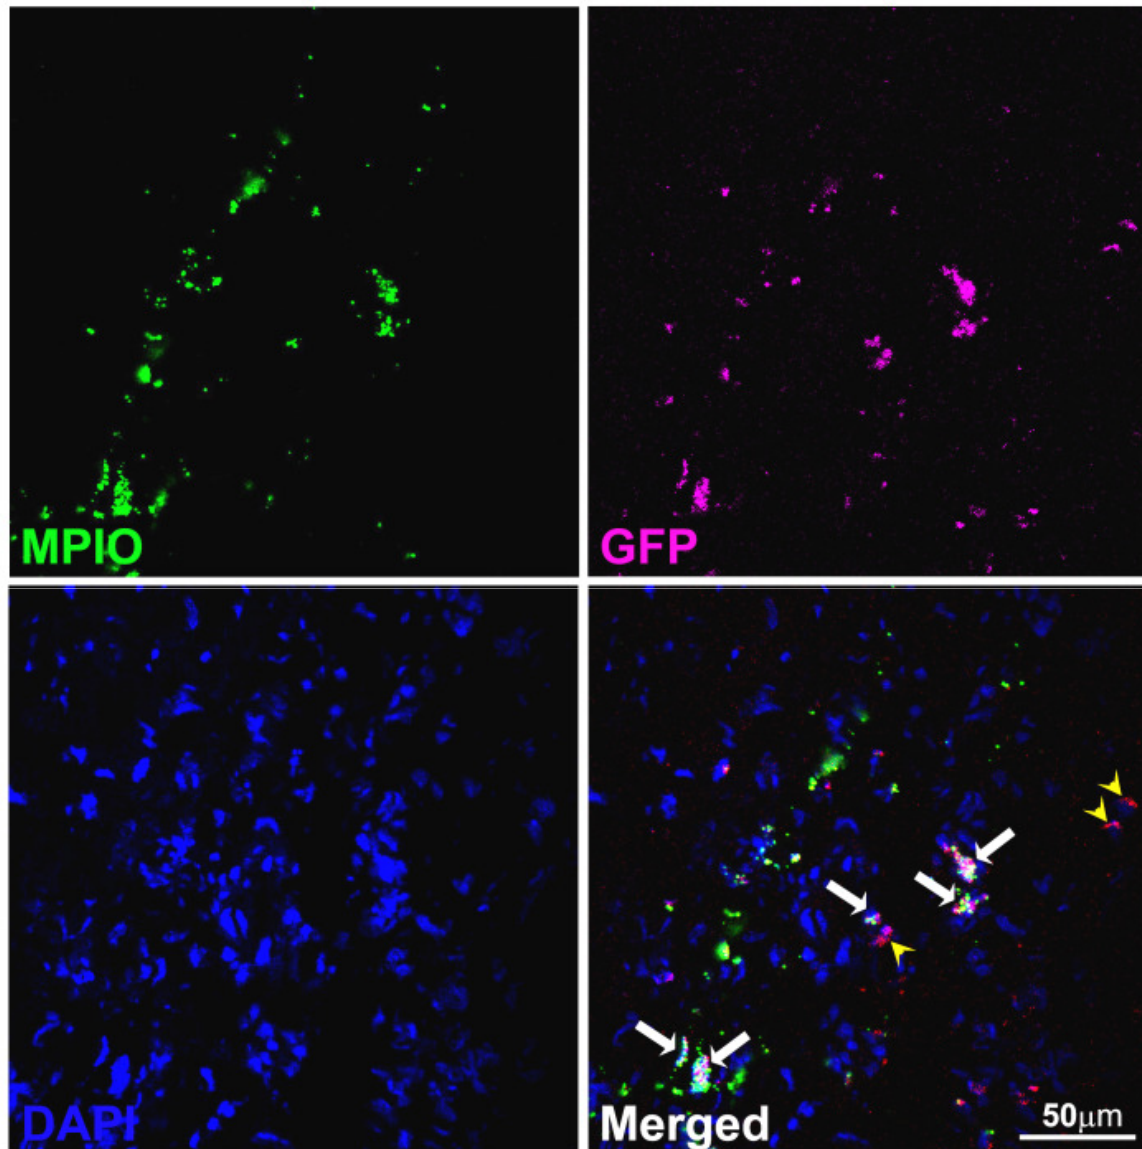

Supplementary figure S3: Detection of GFP-expressing cells labelled with Dil and MPIOs confirmed that administered cells were retained in the hearts after 16 weeks; the white arrows identify double stained GFP+ MPIO+ CDCs, whilst the yellow arrowheads identify GFP+ CDCs alone
